# Supplementary material
Source: PubMed Central journal article supplement (PMC3858957)
Supplement: NIHMS415605-supplement-01.pdf [file NIHMS415605-supplement-01.pdf]

## Supplementary Online Material

### Genes, Economics, and Happiness

Jan-Emmanuel De Neve

Nicholas A. Christakis

James H. Fowler

Bruno S. Frey

**Table 1:** ACE twin models of life satisfaction, by gender

**Figure 1:** Longitudinal cross-twin correlations

**Table 2:** OLS models of association between 5-HTTLPR and life satisfaction that include all available Add Health genetic markers

**Tables 3-6:** Summary statistics

**Figures 2-3:** Sample distributions for life satisfaction

**Table 7:** Potential mediators

Table 6: ACE twin models of life satisfaction, by gender

| Life satisfaction (females) |       |       | <i>Fit statistics</i> |    |       |     |       |           |         |      |
|-----------------------------|-------|-------|-----------------------|----|-------|-----|-------|-----------|---------|------|
|                             | $a^2$ | $c^2$ | $e^2$                 | ep | -2ll  | df  | AIC   | diff -2ll | diff df | p    |
| ACE                         | 0.205 | 0.050 | 0.745                 | 4  | 919.8 | 388 | 143.8 | -         | -       | -    |
| AE                          | 0.263 | -     | 0.737                 | 3  | 919.8 | 389 | 141.8 | 0.05      | 1       | 0.83 |
| CE                          | -     | 0.205 | 0.795                 | 3  | 920.3 | 389 | 142.3 | 0.53      | 1       | 0.47 |
| E                           | -     | -     | 1                     | 2  | 928.0 | 390 | 148.0 | 8.24      | 2       | 0.02 |

  

| Life satisfaction (males) |       |       | <i>Fit statistics</i> |    |       |     |       |           |         |      |
|---------------------------|-------|-------|-----------------------|----|-------|-----|-------|-----------|---------|------|
|                           | $a^2$ | $c^2$ | $e^2$                 | ep | -2ll  | df  | AIC   | diff -2ll | diff df | p    |
| ACE                       | 0.389 | 0.000 | 0.611                 | 4  | 951.3 | 400 | 151.3 | -         | -       | -    |
| AE                        | 0.389 | -     | 0.611                 | 3  | 951.3 | 401 | 149.3 | 0         | 1       | 1    |
| CE                        | -     | 0.308 | 0.692                 | 3  | 955.0 | 401 | 153.0 | 3.73      | 1       | 0.05 |
| E                         | -     | -     | 1                     | 2  | 972.4 | 402 | 168.4 | 21.11     | 2       | 0    |

Figure 3: Longitudinal cross-twin correlations

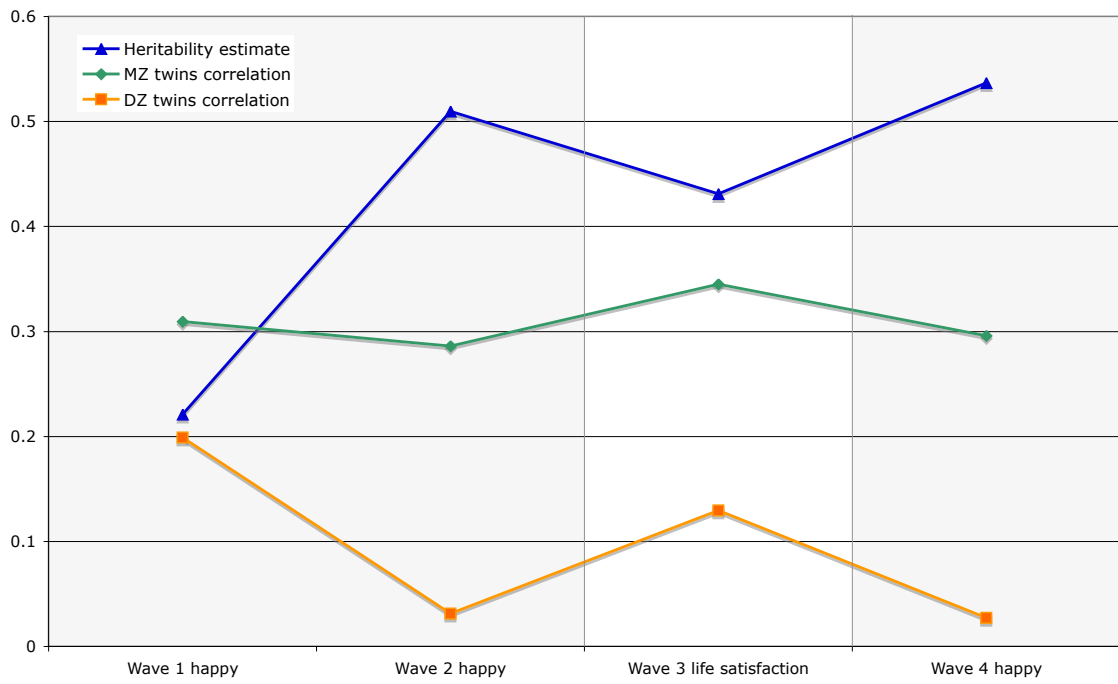

Table 7: OLS models of association between 5-HTTLPR and life satisfaction that include all available Add Health genetic markers. Standard errors (SE) and P-values are also presented.

|                       | <i>Model 1</i> |           |         | <i>Model 2</i> |           |         | <i>Model 3</i> |           |         |
|-----------------------|----------------|-----------|---------|----------------|-----------|---------|----------------|-----------|---------|
|                       | Coeff.         | <i>SE</i> | P-value | Coeff.         | <i>SE</i> | P-value | Coeff.         | <i>SE</i> | P-value |
| 5-HTTLPR: long        | 0.061          | 0.026     | 0.021   | 0.066          | 0.025     | 0.009   | 0.080          | 0.032     | 0.011   |
| MAOA: high            | -0.014         | 0.022     | 0.518   | -0.020         | 0.021     | 0.336   | -0.017         | 0.027     | 0.528   |
| DRD4: r7              | -0.000         | 0.033     | 0.993   | 0.001          | 0.032     | 0.970   | 0.024          | 0.039     | 0.548   |
| DRD2: a2              | 0.008          | 0.030     | 0.777   | -0.000         | 0.029     | 0.991   | 0.048          | 0.036     | 0.243   |
| DAT1: r10             | 0.043          | 0.032     | 0.169   | 0.045          | 0.030     | 0.135   | 0.047          | 0.036     | 0.191   |
| rs2304297: G          | -0.028         | 0.061     | 0.647   | -0.012         | 0.059     | 0.842   | 0.018          | 0.085     | 0.837   |
| rs892413: C           | -0.010         | 0.051     | 0.837   | -0.024         | 0.050     | 0.628   | -0.024         | 0.073     | 0.744   |
| rs4950: G             | -0.042         | 0.065     | 0.520   | -0.039         | 0.062     | 0.528   | 0.006          | 0.077     | 0.939   |
| rs13280604: G         | 0.066          | 0.065     | 0.035   | 0.036          | 0.061     | 0.555   | 0.013          | 0.073     | 0.863   |
| Black                 | -0.138         | 0.065     | 0.035   | -0.150         | 0.065     | 0.020   |                |           |         |
| Hispanic              | 0.294          | 0.160     | 0.067   | 0.256          | 0.147     | 0.081   |                |           |         |
| Asian                 | -0.205         | 0.083     | 0.014   | -0.250         | 0.079     | 0.002   |                |           |         |
| Age                   | 0.006          | 0.010     | 0.581   | -0.009         | 0.010     | 0.390   | -0.027         | 0.013     | 0.033   |
| Male                  | 0.046          | 0.037     | 0.212   | 0.061          | 0.037     | 0.097   | 0.039          | 0.046     | 0.384   |
| Job                   |                |           |         | 0.108          | 0.046     | 0.019   | 0.104          | 0.057     | 0.071   |
| College               |                |           |         | 0.154          | 0.037     | 0.000   | 0.245          | 0.048     | 0.000   |
| Married               |                |           |         | 0.218          | 0.048     | 0.000   | 0.259          | 0.057     | 0.000   |
| Divorced              |                |           |         | -0.285         | 0.154     | 0.065   | -0.265         | 0.159     | 0.096   |
| Religiosity           |                |           |         | 0.160          | 0.020     | 0.000   | 0.131          | 0.026     | 0.000   |
| Welfare               |                |           |         | -0.205         | 0.112     | 0.068   | -0.100         | 0.165     | 0.546   |
| Medication            |                |           |         | -0.072         | 0.037     | 0.053   | -0.129         | 0.046     | 0.005   |
| Intercept             | 3.960          | 0.246     | 0.000   | 3.932          | 0.243     | 0.000   | 4.227          | 0.304     | 0.000   |
| <i>N</i>              | 1939           |           |         | 1910           |           |         | 1110           |           |         |
| <i>R</i> <sup>2</sup> | 0.015          |           |         | 0.087          |           |         | 0.102          |           |         |

## Summary Statistics

Table 8: Sample means.

|                   | Mean | Std Dev | Min | Max |
|-------------------|------|---------|-----|-----|
| Life satisfaction | 4.20 | 0.79    | 1   | 5   |
| 5-HTTLPR long     | 1.14 | 0.72    | 0   | 2   |
| Age               | 21.9 | 1.7     | 18  | 26  |
| Religiosity       | 1.43 | 0.92    | 0   | 3   |

Table 9: Percentage of subjects exhibiting these characteristics.

|            | Percent |
|------------|---------|
| White      | 70.9    |
| Black      | 19.0    |
| Hispanic   | 14.7    |
| Asian      | 8.2     |
| Male       | 47.8    |
| College    | 54.9    |
| Married    | 17.3    |
| Divorced   | 1.4     |
| Welfare    | 4.2     |
| Medication | 61.2    |

Figure 4: Distribution of life satisfaction

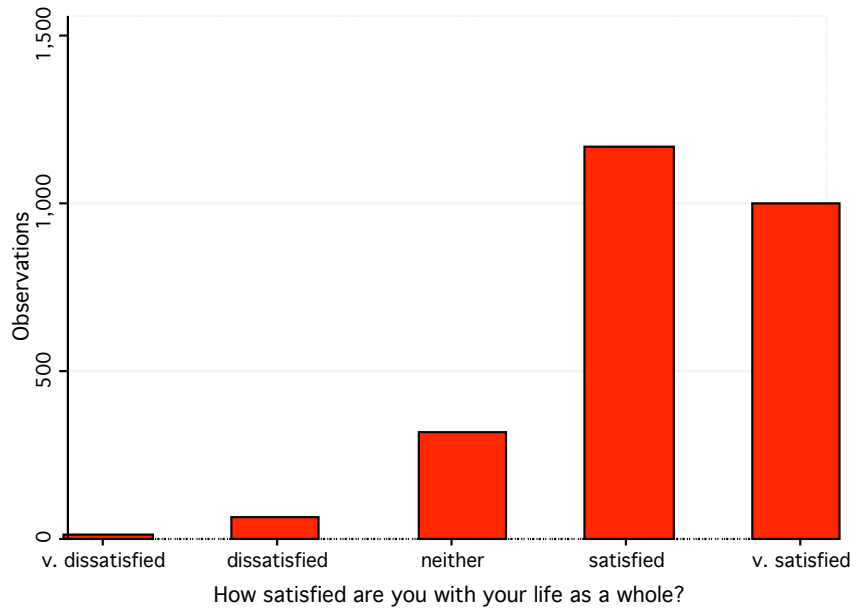

Figure 5: Distribution of life satisfaction, by zygosity

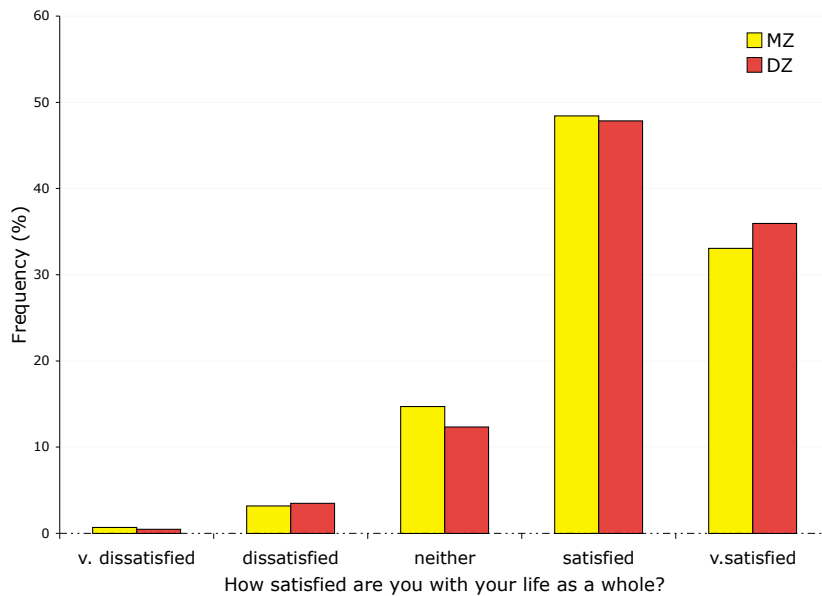

Table 10: Cross-tabs

| Life satisfaction | 5-HTTLPR long                      |                                      |                                    | Total                 |
|-------------------|------------------------------------|--------------------------------------|------------------------------------|-----------------------|
|                   | 0                                  | 1                                    | 2                                  |                       |
| Very dissatisfied | 4<br><i>(0.8%)</i>                 | 4<br><i>(0.3%)</i>                   | 5<br><i>(0.6%)</i>                 | 13<br><i>(0.5%)</i>   |
| Dissatisfied      | 17<br><i>3.3%</i>                  | 35<br><i>2.9%</i>                    | 13<br><i>1.6%</i>                  | 65<br><i>2.6%</i>     |
| Neither           | 72<br><i>14.2%</i>                 | 149<br><i>12.6%</i>                  | 97<br><i>11.3%</i>                 | 318<br><i>12.4%</i>   |
| Satisfied         | 226<br><i>44.4%</i>                | 544<br><i>45.9%</i>                  | 394<br><i>45.7%</i>                | 1,164<br><i>45.6%</i> |
| Very satisfied    | 190<br><i>37.3%</i>                | 453<br><i>38.2%</i>                  | 353<br><i>41.0%</i>                | 996<br><i>39.0%</i>   |
| Total             | 509<br><i>100%</i><br><i>(20%)</i> | 1,185<br><i>100%</i><br><i>(46%)</i> | 862<br><i>100%</i><br><i>(34%)</i> | 2,556<br><i>100%</i>  |

Table 11: 5-HTTLPR genotype frequencies by race (with Hardy-Weinberg equilibrium test statistics)

| Race     | Mean | $\chi^2$ | p-value |
|----------|------|----------|---------|
| White    | 1.12 | 0.28     | 0.60    |
| Black    | 1.47 | 3.36     | 0.07    |
| Hispanic | 0.93 | 3.81     | 0.05    |
| Asian    | 0.69 | 0.29     | 0.59    |

## Potential Mediators

| DV          | <i>5-HTTLPR long</i><br><i>p - value</i> |
|-------------|------------------------------------------|
| Job         | 0.17                                     |
| College     | 0.99                                     |
| Married     | 0.33                                     |
| Divorced    | 0.16                                     |
| Religiosity | 0.48                                     |
| Welfare     | 0.25                                     |
| Medication  | 0.08                                     |

Table 12: Table presents  $p$  values for 5-HTT long in models with job, college attendance, married, divorced, religious, welfare, and medication as dependent variables. Regressions also include race, age, and gender controls.
